# Supplementary material for: OMI NO 2 column densities over North American urban cities: the effect of satellite footprint resolution
Source: Copernicus journal article supplement (doi:10.5194/gmd-9-1111-2016), 2016-03-22
Supplement: Supplementary file [file gmd-9-1111-2016-supplement-title-page.pdf › gmd-9-1111-2016-supplement-title-page.pdf]

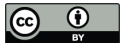

## *Supplement of*

# **OMI NO<sub>2</sub> column densities over North American urban cities: the effect of satellite footprint resolution**

**Hyun Cheol Kim et al.**

*Correspondence to:* Hyun Cheol Kim (hyun.kim@noaa.gov)

- gmd-9-1111-2016-supplement-title-page.pdf
- readme.txt
- routines\_sample\_no2\_omi\_cmaq
  - aqm\_array.pro
  - aqm\_fgi.pro
  - aqm\_gi.pro
  - aqm\_grid.pro
  - aqm\_grid\_limit.pro
  - aqm\_grid\_mid.pro
  - aqm\_grid\_mininfo.pro
  - aqm\_lt2utc.pro
  - aqm\_map\_proj.pro
  - aqm\_plot\_info.pro
  - aqm\_plot\_map.pro
  - aqm\_plot\_mapdata.pro
  - aqm\_plot\_shp.pro
  - aqm\_plot\_tile.pro
  - aqm\_plot\_wind.pro
  - aqm\_polyfillaa.pro
  - aqm\_proj.pro
  - aqm\_regd.pro
  - aqm\_traj\_file.pro
  - array.pro
  - array2.pro

- array\_indices\_reverse.pro
- arrow2.pro
- ary.pro
- ary\_make.pro
- aryn.pro
- arys.pro
- cal\_sigma.pro
- chdmod.pro
- check.pro
- color\_bar.pro
- color\_index.pro
- color\_index2.pro
- color\_load.pro
- color\_table.pro
- convert\_to\_type.pro
- cv\_unit.pro
- cv\_wind.pro
- cvdat.pro
- data\_check.pro
- data\_info\_missing.pro
- data\_type.pro
- date.pro
- date\_check.pro
- date\_j2t.pro
- date\_t2j.pro
- decomposedcolor.pro
- dn\_complete.pro
- dn\_gis\_gadm.pro
- dn\_hysplit\_input.pro
- dn\_no2\_gome2a\_temis.pro
- dn\_no2\_omi\_temis.pro
- dn\_no2\_omi\_temis\_grid\_mon.pro
- dn\_wmap\_kma.pro
- dn\_wmap\_usfntsfsc.pro
- error\_message.pro
- file\_name.pro
- file\_renew.pro
- file\_save.pro
- file\_time.pro
- flag\_dn.pro
- fpufix.pro
- fsc\_color.pro

- gif\_extract\_color.pro
- grouping.pro
- grp.pro
- idx.pro
- ii\_m3.pro
- ii\_shp.pro
- index.pro
- lineclip.pro
- linetrack.pro
- list.sav
- map\_3points.pro
- match.pro
- minfo.pro
- mir\_cb.pro
- mir\_chart.pro
- mir\_ci.pro
- mir\_cl.pro
- mir\_ct.pro
- mir\_hys.pro
- mir\_limit.pro
- mir\_map.pro
- mir\_p.pro
- mir\_sp.pro
- mir\_sp\_include.pro
- mir\_traj.pro
- mir\_wind.pro
- ncdf\_info.pro
- ncdf\_save.pro
- need\_null.pro
- path\_check.pro
- pause.pro
- pickcolorname.pro
- plot\_circle.pro
- plot\_ps.pro
- plot\_shp.pro
- plot\_wind\_barb.pro
- plot\_wmap.pro
- plot\_z.pro
- polyclip.c
- polyclip.pro
- polyfillaa.pro
- pos.pro

- px.pro
- px2dev.pro
- rd\_hys.pro
- rd\_m3.pro
- rd\_ncdf.pro
- rd\_no2\_cmaq.pro
- rd\_no2\_gome2\_temis\_file.pro
- rd\_no2\_gome2a\_temis\_ak.pro
- rd\_no2\_gome2b\_temis\_ak.pro
- rd\_no2\_omi\_temis.pro
- rd\_no2\_omi\_temis\_ak.pro
- rd\_no2\_omi\_temis\_dayfile.pro
- rd\_shp.pro
- rd\_text.pro
- read\_png.pro
- routine\_copy.pro
- routine\_info\_lib.pro
- run\_hysplit.pro
- run\_scr.pro
- sample\_no2\_omi\_cmaq.pro
- scale\_vector.pro
- str.pro
- str\_pos.pro
- str\_progress.pro
- struct.pro
- struct\_list.pro
- struct\_make.pro
- struct\_merge.pro
- struct\_read.pro
- struct\_retag.pro
- struct\_set.pro
- struct\_tag.pro
- struct\_write.pro
- tvimage.pro
- var\_set.pro

The copyright of individual parts of the supplement might differ from the CC-BY 3.0 licence.
